# Supplementary material for: UXT, a novel MDMX-binding protein, promotes glycolysis by mitigating p53-mediated restriction of NF-κB activity
Source: PubMed Central journal article supplement (PMC4627330; doi:10.18632/oncotarget.3770), 2015-05-07
Supplement: oncotarget-06-17584-s001.pdf [file oncotarget-06-17584-s001.pdf]

SUPPLEMENTARY FIGURE LEGENDS

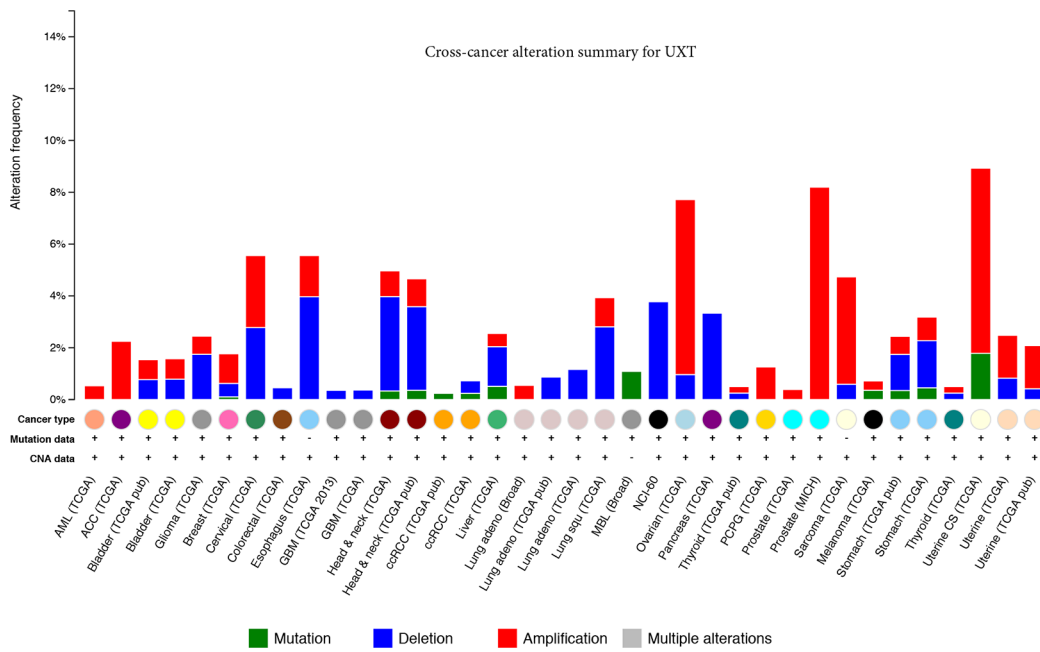

Supplementary Figure S1: Cross-cancer alteration of the *UXT* gene. The information was derived from cBioPortal Cancer Genomics database.

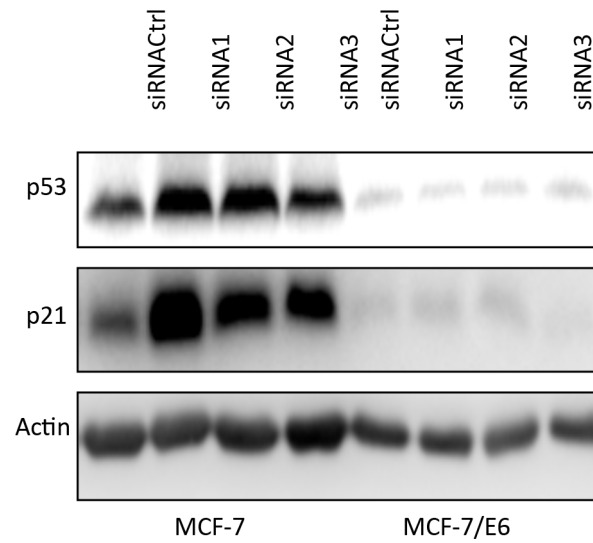

**Supplementary Figure S2: UXT downregulation resulted in p53-dependent p21 induction.** MCF-7 cells or MCF-7/E6 expressing cells were transfected with either siRNACtrl or 3 independent siRNA<sub>UXT</sub> sequences. The cells were harvested 48 h after transfection and analyzed by Western with the indicated antibodies.

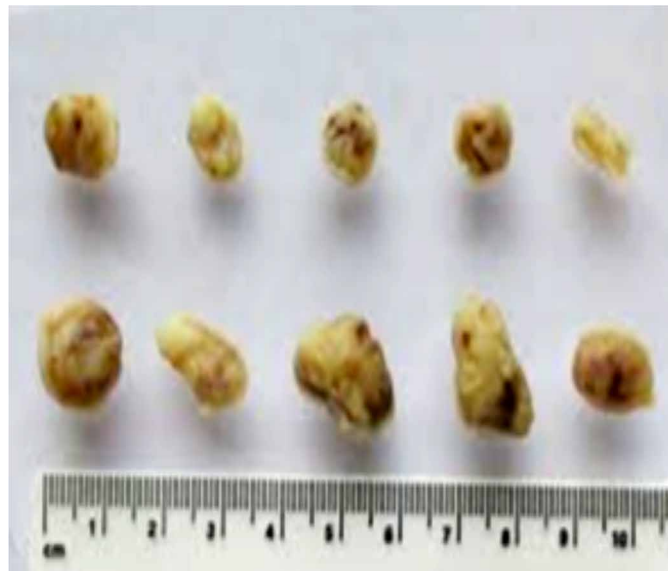

**Supplementary Figure S3: Balb C nude mice were subcutaneously implanted with  $2 \times 10^6$  U2OS<sub>EV</sub> or U2OS<sub>UXT</sub> cells.** The tumors were harvested and their images were shown.

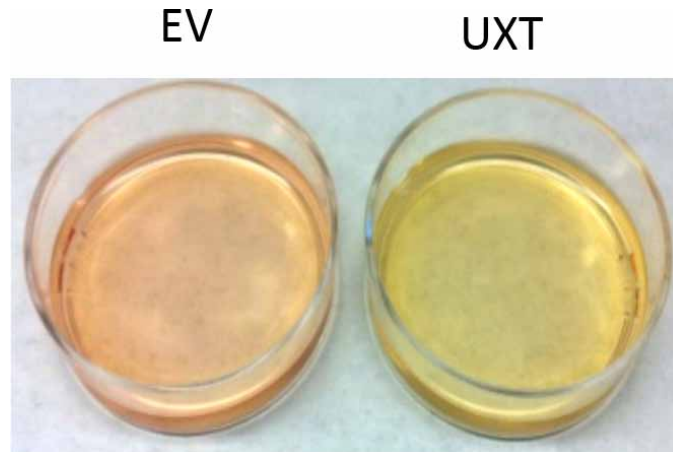

**Supplementary Figure S4: U2OS\_UXT cells produces more acidic metabolites.** The images of culture dishes of U2OS\_EV or U2OS\_UXT cells were taken 24 h after replating.

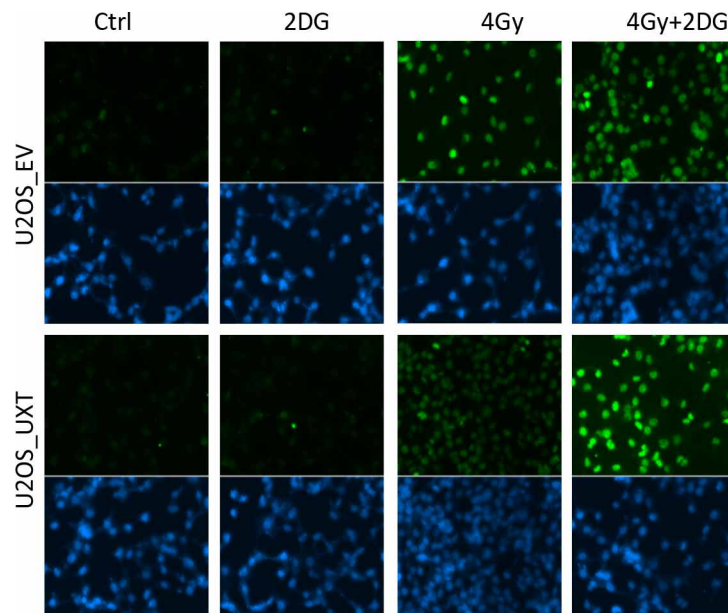

**Supplementary Figure S5: A critical role of glycolysis in modulation of radiation sensitivity of U2OS\_UXT cells.** U2OS\_EV or U2OS\_UXT cells were pre-treated with vehicle or 2-DG (2 mM) for 6 h followed by irradiation at a dose of 4Gy. The cells were fixed 1 h after irradiation and stained with gH2AX. Representative images were shown.
